# Supplementary material
Source: PubMed Central journal article supplement (PMC3582313)
Supplement: bm301858a_si_001.pdf [file bm301858a_si_001.pdf]

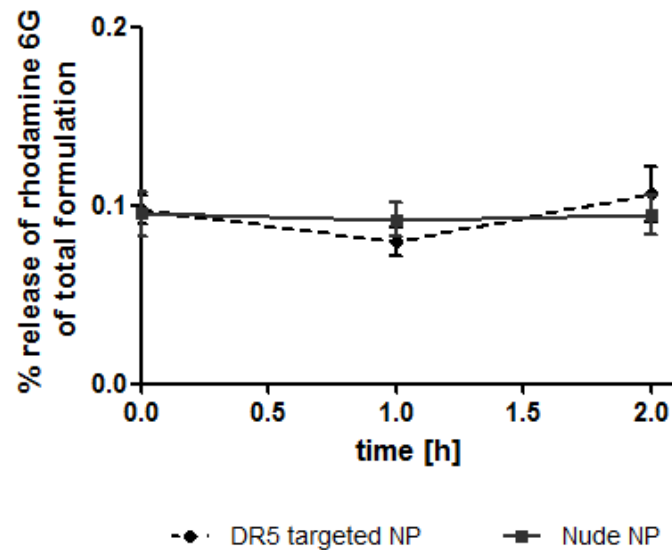

### Supplementary Figure 1

Release of rhodamine 6G from chitosan/alginate nanoparticles was monitored in PBS at 37 °C under shaking, quantified by comparison to a calibration curve of rhodamine at fluorescence of excitation and emission wavelengths of 480/520 nm respectively. Results are presented as a percentage of total formulated rhodamine 6G cumulatively released from both anti-DR5 antibody targeted and non-targeted nanoparticles.
